1 **Rapid, simplified whole blood-based multiparameter assay to quantify and phenotype**  
2 **SARS-CoV-2 specific T cells**

3  
4 Catherine Riou<sup>1,2,\*</sup>, Georgia Schäfer<sup>1,3,4</sup>, Elsa du Bruyn<sup>1,5</sup>, Rene T. Goliath<sup>1</sup>, Cari Stek<sup>1,5,6</sup>, Huihui  
5 Mou<sup>7</sup>, Deli Hung<sup>8</sup>, Katalin A. Wilkinson<sup>1,5,9</sup>, Robert J. Wilkinson<sup>1,5,6,9</sup>

6  
7 <sup>1</sup> Wellcome Centre for Infectious Disease Research in Africa and Institute of Infectious Disease  
8 and Molecular Medicine, University of Cape Town, Observatory 7925, South Africa  
9 <sup>2</sup> Division of Immunology, Department of Pathology, University of Cape Town, Observatory  
10 7925, South Africa  
11 <sup>3</sup> International Centre for Genetic Engineering and Biotechnology (ICGEB) Cape Town,  
12 Observatory 7925, South Africa  
13 <sup>4</sup> Division of Medical Biochemistry and Structural Biology, Department of Integrative  
14 Biomedical Sciences, University of Cape Town, Observatory 7925, South Africa  
15 <sup>5</sup> Department of Medicine, University of Cape Town, Observatory 7925, South Africa  
16 <sup>6</sup> Department of Infectious Diseases, Imperial College London, W12 0NN, UK  
17 <sup>7</sup> Department of Immunology and Microbiology, The Scripps Research Institute, Jupiter, FL  
18 33458, USA  
19 <sup>8</sup> Department of Immunology and Microbiology, The Scripps Research Institute, La Jolla, CA  
20 92037, USA  
21 <sup>9</sup> The Francis Crick Institute, London, NW1 1AT, UK  
22

23 \* **Corresponding Author:** Catherine Riou, University of Cape Town, IDM, Anzio Road,  
24 Observatory, 7925, Cape Town, South Africa. E-mail: [cr.riou@uct.ac.za](mailto:cr.riou@uct.ac.za)

25  
26 **Key words:** COVID-19, T cells, Whole blood Assay

27  
28 **Running title:** SARS-CoV-2-specific whole blood T cell assay.

29  
30 **40-word summary:** In this proof of concept study, we show that SARS-CoV-2 T cell responses  
31 are easily detectable using a rapid whole blood assay requiring minimal blood volume. Such  
32 assay could represent a suitable tool to monitor adaptive immunity in vaccine trials.

33 **ABSTRACT**

34

35 Rapid tests to evaluate SARS-CoV-2-specific T cell responses are urgently needed to decipher  
36 protective immunity and aid monitoring vaccine-induced immunity. Using a rapid whole blood  
37 assay requiring minimal amount of blood, we measured qualitatively and quantitatively SARS-  
38 CoV-2-specific CD4 T cell responses in 31 healthcare workers, using flow cytometry. 100% of  
39 COVID-19 convalescent participants displayed a detectable SARS-CoV-2-specific CD4 T cell  
40 response. SARS-CoV-2-responding cells were also detected in 40.9% of participants with no  
41 COVID-19-associated symptoms or who tested PCR negative. Phenotypic assessment indicated  
42 that, in COVID-19 convalescent participants, SARS-CoV-2 CD4 responses displayed an early  
43 differentiated memory phenotype with limited capacity to produce IFN $\gamma$ . Conversely, in  
44 participants with no reported symptoms, SARS-CoV-2 CD4 responses were enriched in late  
45 differentiated cells, co-expressing IFN $\gamma$  and TNF $\alpha$  and also Granzyme B. This proof of concept  
46 study presents a scalable alternative to PBMC-based assays to enumerate and phenotype SARS-  
47 CoV-2-responding T cells, thus representing a practical tool to monitor adaptive immunity in  
48 vaccine trials.

## 49 INTRODUCTION

50

51 The outbreak of SARS-CoV-2 infection (causing the disease known as COVID-19) that first  
52 emerged in Wuhan, China in December 2019, was declared a global pandemic on 12<sup>th</sup> March  
53 2020, and is affecting all countries of the world, including those of Africa (Margolin et al., 2020).

54 There is an urgent need to understand better the clinical manifestations and the pathogenesis of  
55 SARS-CoV-2 in order to develop relevant tools, including diagnostic tests, treatments and  
56 vaccines, to stop the spread of disease as well as strategies to best manage this disease in all  
57 population groups.

58

59 The clinical spectrum of COVID-19 is very wide, from asymptomatic through mild flu-like  
60 symptoms to severe pneumonia and death. Understanding what constitutes immune protection  
61 against SARS-CoV-2 is key to predicting long-term immunity and to inform vaccine design.

62 While much emphasis has been placed on the B cell and antibody response, it is not yet clear  
63 what type of immune response confers protection to SARS-CoV-2 (Cox and Brokstad, 2020).

64 Several studies suggest that the T cell response may play an important role in SARS-CoV-2  
65 pathogenesis and reports indicating that patients lacking B cells can recover from SARS-CoV-2  
66 infection further highlight the likely importance of T cell immunity (Altmann and Boyton, 2020);  
67 (Quinti et al., 2020). Additionally, accumulating evidence indicates that the presence of pre-  
68 existing, cross-reactive memory T cells specific for common cold coronaviruses may affect  
69 susceptibility to SARS-CoV-2 infection and partially explain the markedly divergent clinical  
70 manifestations of COVID-19 (Braun et al., 2020; Canete and Vinuesa, 2020; Lipsitch et al., 2020;  
71 Sette and Crotty, 2020).

72

73 Efficient, sensitive and simple assessment of human T-cell immunity remains a challenge. Most  
74 commonly used T cell assays necessitate the isolation of peripheral blood mononuclear cells

75 (PBMC), requiring significant amount of blood. Therefore, whole blood assays could be more  
76 advantageous than PBMC-based methods, by significantly reducing blood volume (~ 1 ml),  
77 making them more applicable to paediatric populations. Moreover, such assays are rapid, as they  
78 don't require cell separation, and preserve the physiologic cellular and soluble environments,  
79 mimicking better human blood condition. Here we report a rapid (~ 7 hrs) whole blood-based  
80 detection method of SARS-CoV-2-specific T cell responses with simple steps that could be  
81 adapted to settings of limited resources. This rapidly applicable assay could represent an easily  
82 standardizable tool to assess SARS-CoV-2-specific adaptive immunity to monitor T cell  
83 responses in vaccine trials, gain insight into what constitutes a protective response, or define the  
84 prevalence of SARS-CoV-2 T cell responders population wide.

## 85 **METHODS**

86

### 87 ***Study population***

88 The population studied consisted of healthcare workers (HCW, n=31, 29% male) recruited  
89 between July and September 2020, from Groot Schuur Hospital in Cape Town, the hardest hit  
90 region of the initial COVID-19 epidemic in South Africa (Mendelson et al., 2020). Participants  
91 were classified according to i) reporting of COVID-19-associated symptoms, ii) whether a  
92 SARS-CoV-2 RNA PCR from a nasal or pharyngeal swab was performed and iii) SARS-CoV-2  
93 PCR results. Based on these criteria, participants were subdivided into three groups: 1) persons  
94 with no COVID-19-associated symptoms (n=15); 2) persons who reported symptoms but tested  
95 SARS-CoV-2 PCR negative (n = 7); and 3) persons who had COVID-19-associated symptoms  
96 and tested SARS-CoV-2 PCR positive (n = 9) (**Table 1**). In all groups, the exposure to COVID-  
97 19 patients was comparable (86.8 to 100%). All participants with PCR confirmed COVID-19 had  
98 mild symptoms and did not require hospitalization. Blood samples were obtained a median of 7.3  
99 weeks post-SARS-CoV-2 testing in persons with a negative test results and 4.7 weeks in those  
100 with a confirmed positive result (p=0.09). All participants were symptom-free at the time of  
101 sampling. In four SARS-CoV-2 PCR positive participants, a second sample was obtained 1  
102 month later. The University of Cape Town's Faculty of Health Sciences Human Research Ethics  
103 Committee approved the study (HREC: 207/2020) and written informed consent was obtained  
104 from all participants.

105

### 106 ***Measurement of SARS-CoV-2 nucleocapsid-specific IgG in plasma***

107 The measurement of SARS-CoV-2 specific antibodies was performed using the Roche Elecsys®  
108 Anti-SARS-CoV-2 immunoassay (Roche Diagnostics, Basel, Switzerland). This semi-  
109 quantitative electro-chemiluminescent immunoassay measures SARS-CoV-2 nucleocapsid-  
110 specific IgG. The assay was performed by the South African National Health Laboratory Service

111 (NHLS) and interpreted according to manufacturers' instructions (Roche: V 1.0 2020-05).  
112 Results are reported as numeric values in form of a cut-off index (COI; signal sample/cut-off),  
113 where a COI < 1.0 corresponds to non-reactive plasma and COI  $\geq$  1.0 to reactive plasma. At 14  
114 days post-SARS-CoV-2 PCR confirmation, the sensitivity and specificity of the Elecsys® Anti-  
115 SARS-CoV-2 immunoassay is reported as 99.5% (95% CI, 97.0 to 100.0%) and 99.80% (95%  
116 CI, 99.69 to 99.88%), respectively (Favresse et al., 2020; Muench et al., 2020; National, 2020).

117

### 118 **SARS-CoV-2 pseudovirus neutralisation assay**

119 Patient plasma was evaluated for SARS-CoV-2 neutralisation activity using a SARS-CoV-2  
120 pseudovirus infection assay. Single-cycle infectious SARS-CoV-2 pseudovirions based on the  
121 HIV backbone expressing the SARS-CoV-2 Spike (S) protein and a firefly luciferase reporter  
122 were produced in HEK-293TT cells (Buck et al., 2004; Buck et al., 2005) by co-transfection of  
123 plasmids pNL4-3.Luc.R-.E- (NIH AIDS Reagent Program (#3418), Germantown, MD, USA) and  
124 pcDNA3.3-SARS-CoV-2-spike  $\Delta$ 18 (Rogers et al., 2020). HEK-293TT cell culture supernatants  
125 containing the virions were harvested 3 days post transfection and incubated with heat-inactivated  
126 patient plasma at 5-fold serial dilutions for 60 min at 37°C. Plasma/pseudovirus mixtures were  
127 then used for transfection of HEK-293T cells stably expressing the ACE2 receptor (Mou et al.,  
128 2020). Cells were lysed 3 days post infection using the Promega cell culture lysis reagent  
129 (Promega Biosciences Inc., San Luis Obispo, CA, USA) and assessed for luciferase activity using  
130 a GloMax® Explorer Multimode Microplate Reader (Promega Biosciences) together with the  
131 Luciferase assay system (Promega Biosciences).

132

### 133 ***Whole blood-based T cell detection assay***

134 Blood was collected in sodium heparin tubes and processed within 3 h of collection. The whole  
135 blood-based SARS-CoV-2-specific T cell detection assay was adapted from a previously reported  
136 whole blood intracellular cytokine detection assay designed to quantitate *Mycobacterium*

137 *tuberculosis* specific T cells in small volumes of blood (Hanekom et al., 2004). However,  
138 significant modifications have been made, including a reduced incubation time, the usage of a  
139 fixation buffer allowing the simultaneous lysis of red blood cells to streamline processing time,  
140 leading to faster acquisition of results (Riou et al., 2020). Here, we adapted this assay to detect  
141 SARS-CoV-2 specific T cells using synthetic SARS-CoV-2 PepTivator peptides (Miltenyi  
142 Biotec, Surrey, UK), consisting of 15-mer sequences with 11 amino acid overlap covering the  
143 immunodominant parts of the spike (S) protein, and the complete sequence of the nucleocapsid  
144 (N) and membrane (M) proteins. All peptides were combined in a single pool and used at a final  
145 concentration of 1 µg/ml. The workflow of the assay is presented in **Figure 1**. Briefly, 400 µl  
146 whole blood was stimulated with the SARS-CoV-2 S, N and M protein peptide pool at 37°C for 5  
147 hrs in the presence of the co-stimulatory antibodies against CD28 and CD49d (1 µg/ml each; BD  
148 Biosciences, San Jose, CA, USA) and Brefeldin-A (10 µg/ml, Sigma-Aldrich, St Louis, MO,  
149 USA). Unstimulated blood was incubated with co-stimulatory antibodies, Brefeldin-A and an  
150 equimolar amount of DMSO. Red blood cell lysis and white cell fixation was then performed as a  
151 single step using a Transcription Factor Fixation buffer (eBioscience, San Diego, CA, USA) for  
152 20 minutes. At this stage cells were cryopreserved in freezing media (50% foetal bovine serum,  
153 40% RPMI and 10% dimethyl sulfoxide) and stored in liquid nitrogen until batched analysis.  
154  
155 Cell staining was performed on cryopreserved cells that were thawed, washed and permeabilised  
156 with a Transcription Factor perm/wash buffer (eBioscience). Cells were then stained at room  
157 temperature for 30 min with antibodies for CD3 BV650, CD4 BV785, CD8 BV510, CD45RA  
158 Alexa 488, CD27 PE-Cy5, CD38 APC, HLA-DR BV605, Ki67 PerCP-cy5.5, PD-1 PE,  
159 Granzyme B (GrB) BV421, IFN $\gamma$  BV711, TNF $\alpha$  PE-Cy7 and IL-2 PE/Dazzle 594, as detailed in  
160 **Supplementary Table 1**. Samples were acquired on a BD LSR-II and analysed using FlowJo  
161 (v9.9.6, FlowJo LCC, Ashland, OR, USA). A positive response was defined as any cytokine  
162 response that was at least twice the background of unstimulated cells. To define the phenotype of

163 SARS-CoV-2-specific CD4 T cells, a cut-off of 30 events was used. The gating strategy is  
164 provided in **Supplementary Figure 1**.

165

166 *Statistical analyses*

167 Graphical representations were performed in Prism (v8.4.3; GraphPad Software Inc, San Diego,  
168 CA, USA) and JMP (v14.0.0; SAS Institute, Cary, NC, USA). Statistical tests were performed in  
169 Prism. Non-parametric tests were used for all comparisons. The Kruskal-Wallis test with Dunn's  
170 multiple comparison test was used for multiple comparisons and the Mann-Whitney and  
171 Wilcoxon matched pairs test for unmatched and paired samples, respectively.



172 **RESULTS**

173

174 ***Serological assessment of SARS-CoV-2 sensitization.***

175 Even though RT-PCR is the most specific technique to detect acute SARS-CoV-2 infection, the  
176 positivity rate drops rapidly as soon as 10 days post-symptom onset, particularly in individuals  
177 with mild forms of COVID-19 (Liu et al., 2020a; Liu et al., 2020b). Hence, serology assays  
178 provide an important complement to RNA testing to identify individuals who have been  
179 sensitized by SARS-CoV-2. Thus, to assess potential SARS-CoV-2 sensitization in participants  
180 who did not have a SARS-CoV-2 PCR test performed or tested PCR negative, the presence of  
181 SARS-CoV-2-specific antibodies (e.g. SARS-CoV-2 nucleocapsid-specific IgG) was measured  
182 and a SARS-CoV-2 pseudovirus neutralisation assay was also performed in all participants.

183 While all participants with a positive SARS-CoV-2 PCR test exhibited *in vitro* anti-SARS-CoV-2  
184 neutralizing activity and 8/9 (88.8%) had detectable SARS-CoV-2 nucleocapsid-specific IgG,  
185 none of the participants who tested negative or did not undergo PCR testing were positive for  
186 SARS-CoV-2 nucleocapsid-specific IgG (**Figure 2A**) or displayed robust *in vitro* anti-SARS-  
187 CoV-2 activity (**Figure 2B**). Overall, these results confirmed that PCR positive participants had  
188 been infected with SARS-CoV-2 and mounted an immune response to the virus and suggested  
189 that none of the participants who did not have a PCR test performed or tested PCR negative,  
190 despite experiencing COVID-19-like symptoms, have been SARS-CoV-2 infected.

191

192 ***Magnitude and functional profile of SARS-CoV-2-responding CD4 T cells.***

193 Amongst the 31 participants tested, 58% (n=18) had a detectable SARS-CoV-2-specific CD4 T  
194 cell response (producing any of the measured cytokines, IFN $\gamma$ , TNF $\alpha$  or IL-2) using the described  
195 whole blood assay (**Figure 3A**). We then defined the magnitude and phenotype of SARS-CoV-2  
196 -specific CD4 responses according to participants' clinical characteristics (**Figure 3B&C**). All  
197 HCW with self-reported symptoms and a SARS-CoV-2 PCR positive test (n=9) were found to

198 have SARS-CoV-2-specific CD4 T cells (median frequency: 0.47%, IQR: 0.28-0.65) (**Figure**  
199 **3C**). Of note, the frequency of SARS-CoV-2 specific CD4 T cells did not associate with the  
200 magnitude of SARS-CoV-2 nucleocapsid-specific IgG ( $p = 0.64$ ,  $r = -0.18$ ) or plasma  
201 neutralizing activity ( $p = 0.46$ ,  $r = 0.28$ ) (data not shown). Interestingly, in participants with no  
202 detectable SARS-CoV-2 nucleocapsid-specific IgG or neutralizing antibody activity, of those  
203 with self-reported symptoms, 3/7 (43%) had detectable SARS-CoV-2-responding CD4 T cells  
204 (median of responders: 0.02%, IQR: 0.019-0.03) and 6/15 (40%) of those with no self-reported  
205 symptoms had detectable SARS-CoV-2-responding CD4 T cells (median of responders: 0.15%,  
206 IQR: 0.05-1.47), suggesting that these responses correspond to SARS-CoV-2 cross-reactive  
207 memory CD4 T cells.

208 Next, we defined the polyfunctional profile of SARS-CoV-2-responding CD4 T cells, based on  
209 their capacity to co-express IL-2, IFN $\gamma$  or TNF $\alpha$  (**Figure 3D**). The overall functional profile of  
210 SARS-CoV-2-specific cells in PCR positive participants was distinct from participants with no  
211 reported symptoms ( $p=0.0002$ ). Indeed, the SARS-CoV-2-specific CD4 response in PCR+  
212 participants was characterized by limited expression of IFN $\gamma$  and was enriched in cells co-  
213 expressing IL-2 and TNF $\alpha$ . On the contrary, in participants reporting no symptom, most SARS-  
214 responding CD4 cells were distributed between triple functional cells (IL-2+IFN $\gamma$ +TNF $\alpha$ +) and  
215 cells co-producing IFN $\gamma$  and TNF $\alpha$ . Overall, in this assay TNF $\alpha$  was the predominant cytokine  
216 produced, with its production being significantly higher compared to IL-2 ( $p = 0.0026$ ) and IFN $\gamma$   
217 ( $p < 0.0001$ ) (**Supplementary Figure 2**).

218

### 219 *Phenotypic assessment of SARS-CoV-2-responding CD4 T cells*

220 While the proposed assay can be performed using a limited antibody panel to identify the  
221 frequency of SARS-CoV-2-responding T cells, by solely measuring cytokine production, the use  
222 of a more extensive antibody panel also permits definition of the phenotypic profile of these cells.  
223 To this end, we included additional markers to assess the memory differentiation (CD27,

224 CD45RA), cytotoxic potential (GrB) and activation profile (HLA-DR, CD38, Ki67, PD-1) of  
225 SARS-CoV-2-responding CD4 T cells.

226 **Figure 4A&B** shows that in all individuals with symptoms, SARS-CoV-2-specific CD4 T cells  
227 displayed almost exclusively (median: 97.7%) an early differentiated memory phenotype (ED:  
228 CD45RA-CD27+). On the contrary, in 4/6 HCW with no symptoms, SARS-CoV-2-specific CD4  
229 T cells exhibited a predominant late differentiated phenotype (LD: CD45RA-CD27-).

230 While the role of cytotoxic CD4 T cells is still unclear, the presence of these cells has been  
231 described in several viral infections (Juno et al., 2017). We thus measured GrB expression in  
232 SARS-CoV-2-responding CD4 T cells. While GrB was barely detectable in SARS-CoV-2-  
233 specific CD4 T cells in PCR positive participants, elevated GrB expression was observed in 4 out  
234 of 6 participants without symptoms (**Figure 4C&D**). Moreover, the proportion of ED SARS-  
235 CoV-2-responding CD4 T cells inversely associated with GrB expression ( $p = 0.002$ ,  $r = -0.71$ )  
236 and the proportion of IFN $\gamma$  and TNF $\alpha$  dual producing cells ( $p < 0.0001$ ,  $r = -0.84$ ) (**Figure 4E**).  
237 The phenotypic characteristics of GrB expressing SARS-CoV-2-responding CD4 T cells (i.e.  
238 highly differentiated and producing IFN $\gamma$  and TNF $\alpha$ ) are in agreement with a recent report  
239 describing CMV-specific CD4 CTL T cells (Pachnio et al., 2016).

240  
241 To determine if the overall phenotypic profile of SARS-CoV-2-responding CD4 T cells allowed  
242 discrimination of participants based on their clinical characteristics, we performed a hierarchical  
243 clustering analysis (**Figure 5A**) and a principal component analysis (PCA) (**Figure 5B**),  
244 including four parameters (e.g. proportion of IFN $\gamma$ +TNF $\alpha$ +IL2+ and IFN $\gamma$ -TNF $\alpha$ +IL2+ cells,  
245 proportion of ED, and GrB expression). Both analyses show that participants who reported no  
246 symptoms and were negative for SARS-CoV-2 Abs separated clearly from PCR positive  
247 participants. Conversely, PCR and SARS-CoV-2 antibody negative HCWs reporting symptoms  
248 could not be separated from PCR positive participants. The loading plot shows that GrB  
249 expression and the proportion of triple positive cells were the main drivers permitting the

250 segregation of participants who reported no symptoms and were negative for SARS-CoV-2 Abs  
251 (**Figure 5C**)

252

253 Lastly, as the expression of activation markers (HLA-DR, CD38, PD-1 or Ki67) on antigen-  
254 specific T cells are indicative of active infection (Chen and Wherry, 2020; Mathew et al., 2020),  
255 we defined the expression of these markers on SARS-CoV-2-responding CD4 T cells. No  
256 significant difference was observed in any of the measured markers amongst the different groups,  
257 notwithstanding a few outliers observed in the PCR positive participant group (**Figure 6A**).

258 Interestingly, regardless of the participants' clinical characteristics, PD-1 expression was highly  
259 expressed on SARS-CoV-2-responding CD4 T cells, raising the question of a potential intrinsic  
260 dysfunction/exhaustion of coronavirus-specific memory CD4 T cells (Jubel et al., 2020; Wherry  
261 and Kurachi, 2015; Wykes and Lewin, 2018). We then defined the relationship between the  
262 activation profile of SARS-CoV-2-specific CD4 T cells and time post positive PCR test.

263 **Figure 6B** shows that in PCR positive participants, the expression of CD38 associated strongly  
264 with the time post PCR testing ( $p < 0.0001$ ,  $r = -0.91$ ), where CD38 expression decreased sharply  
265 in the first 2 to 3 weeks post testing, suggesting a rapid clearance of the pathogen. Similar  
266 associations were observed for all tested activation markers, with CD38 expression showing the  
267 strongest correlation (**Figure 6C**).

## 268 **DISCUSSION**

269

270 In this proof of concept analysis assessing the use of a simple whole blood assay to  
271 measure SARS-CoV-2-specific T cell responses in a small health care worker cohort, we show  
272 that SARS-CoV-2-specific CD4 T cells (expressing IFN $\gamma$ , TNF $\alpha$  or IL-2) were easily detectable  
273 in all tested convalescent COVID-19 participants. However, in participants who did not  
274 experience any COVID-19-related symptoms or tested SARS-CoV-2 PCR negative (despite  
275 reporting symptoms), 9/22 (40.9%) also exhibited a detectable SARS-CoV-2-specific CD4 T cell  
276 response. Nevertheless, the median frequency of SARS-CoV-2-specific CD4 T cells in the latter  
277 groups was  $\sim$  5-fold lower compared to SARS-CoV-2 PCR positive participants. Importantly,  
278 unlike convalescent COVID-19 participants, none of participants without symptoms or who  
279 tested PCR negative had detectable SARS-CoV-2 nucleocapsid-specific IgG or displayed robust  
280 neutralizing activity. This strongly suggests that in these participants, SARS-CoV-2-responding  
281 CD4 T cells may correspond to a pre-existing cross-reactive memory CD4 T cell response. Thus,  
282 the sole presence SARS-CoV-2-reactive CD4 T cells does not permit to infer SARS-CoV-2  
283 infection or sensitization. These findings are in line with a number of studies demonstrating the  
284 presence of SARS-CoV-2-reactive CD4 T cells in 40 to 60% of SARS-CoV-2-unexposed  
285 individuals in different populations around the world (Grifoni et al., 2020; Le Bert et al., 2020;  
286 Rydyznski Moderbacher et al., 2020; Sekine et al., 2020). Additionally, it is important to point  
287 out that all these studies were performed using PBMC and it is encouraging to find that a whole  
288 blood-based assay using limited amount of blood ( $<$  1ml) yields comparable results.

289 Further analyses of the polyfunctional and phenotypical profile of SARS-CoV-2-specific  
290 CD4 T cells revealed that regardless of the clinical characteristics of the participants, the most  
291 prevalent cytokine detected in response to SARS-CoV-2 peptides was TNF $\alpha$ . These observations  
292 are in accordance with other studies pointing out an impairment of SARS-CoV-2 adaptive  
293 immune responses, characterized by low level of type I and type II interferon (Blanco-Melo et al.,

294 2020; Sattler et al., 2020). However, it is also possible that the limited IFN $\gamma$  production, we  
295 observed in this study, is related to the short stimulation time (e.g. 5hrs) used in the assay.  
296 Nevertheless, this suggests that TNF $\alpha$  could be a more reliable target than IFN $\gamma$ , to detect SARS-  
297 CoV-2-specific CD4 T cell responses. Additionally, SARS-CoV-2-responding CD4 T cells in all  
298 participants were characterized by elevated of PD-1 expression. Such profiles have been observed  
299 in acute SARS-CoV-2 infection and is likely driven by ongoing viral replication (Schub et al.,  
300 2020; Sekine et al., 2020; Zheng et al., 2020). However, PD-1 expression on antigen-specific T  
301 cells has been shown to decrease upon pathogen clearance (Barber et al., 2006; Sester et al.,  
302 2008). Thus, elevated PD-1 expression in COVID-19 convalescent persons and uninfected  
303 responders could reflect an intrinsic state of functional exhaustion of SARS-CoV-2-reactive  
304 memory CD4 T cells.

305         Lastly, SARS-CoV-2-responding CD4 T cells were qualitatively different between  
306 convalescent COVID-19 participants and participants who did not experience COVID-19-  
307 associated symptoms. In the former group, SARS-CoV-2-specific CD4 T cells displayed almost  
308 exclusively an early differentiated memory phenotype; while in the latter group, SARS-CoV-2-  
309 responsive CD4 T cells exhibited a late differentiated memory phenotype and were enriched in  
310 GrB. Differences in the attributes of SARS-CoV-2-reactive T cells distinguishing recent SARS-  
311 CoV-2 infection from pre-existing immunity have been recently reported: strong *ex vivo* Elispot  
312 responses and enhanced proliferation capacity were frequently observed in confirmed COVID-19  
313 patients but rare in pre-pandemic or unexposed seronegative persons (Ogbe et al., 2020). This is  
314 consistent with the phenotypic features we observed in our study. It remains to be determined  
315 whether the presence of pre-existing cross-reactive memory T cells offers any protection against  
316 SARS-CoV-2.

317         Although our results rely on a small number of participants and need to be confirmed in  
318 larger cohorts, this study suggests that a whole blood assay could represent a valuable tool to  
319 assess SARS-CoV-2-specific adaptive immunity. The whole blood assay described here is rapid

320 and scalable for varying complexities depending on laboratory resources and questions to be  
321 addressed. It can be adapted to a simple 4-colour flow cytometry assay to monitor the frequency  
322 of T cell responses in epidemiological studies or vaccine trials. Alternatively, it can also be used  
323 to characterize in more depth the specific attributes of SARS-CoV-2-specific T cells, as shown  
324 here, to aid deciphering cellular features that may associate with immune correlates of protection.  
325 Finally, as this standardizable assay requires a limited volume of blood, it can be easily used in  
326 COVID-19 paediatric cases.

327 **Acknowledgment:** The authors thank all the participants.

328

329 **Funding sources:** This work was supported by Wellcome [grant number: 104803 and 203135]  
330 and Crick idea to innovation (i2i) scheme in partnership with the Rosetrees Trust [grant number:  
331 2020-0009]. CR is supported by the European and Developing Countries Clinical Trials  
332 Partnership EDCTP2 programme supported by the European Union (EU)'s Horizon 2020  
333 programme [grant number: Training and Mobility Action TMA2017SF-1951-TB-SPEC to CR]  
334 and the National Institutes of Health (NIH) [grant number:R21AI148027 to CR]. GS is supported  
335 by the European and Developing Countries Clinical Trials Partnership EDCTP2 programme  
336 [grant number: Training and Mobility Action TMA2018SF-2446 to GS]. RJW and KAW receive  
337 support from the Francis Crick institute, which is funded by the UK Medical Research Council  
338 UKRI, Cancer Research UK and Wellcome [grant number: FC0010218].

339

340 **Author contributions:** CR, KAW and RJW designed the study. CR performed the whole blood  
341 assay and flow cytometry experiments and analysed and interpreted the data. GS performed the  
342 neutralizing assay experiments. EdB, RTG and CS recruited the study participants. KAW, HM  
343 and EL provided critical reagents. CR and KAW wrote the manuscript with all authors  
344 contributing to providing critical feedback.

345

346 **Conflict of interest:** The authors declare no conflict of interest.



347 **FIGURE LEGENDS**

348

349 **Figure 1: Schematic showing methodology and workflow of the whole blood assay for the**  
350 **detection of SARS-CoV-2-specific adaptive immune responses. Step 1:** 400 µl of heparinized  
351 whole blood is incubated for 5 hours in the presence of a SARS-CoV-2-specific peptide pool in  
352 the presence of co-stimulatory antibodies (i.e. CD28 and CD49d) and Brefeldin-A. **Step 2:** Cells  
353 are incubated for 20 min in the presence of a transcription factor fixation buffer, leading to the  
354 simultaneous lysis of red blood cells and cell fixation. **Step 3:** Cells are stained for 30 min with  
355 an optimized panel of fluorophore labelled antibodies. **Step 4:** Samples are acquired on a flow  
356 cytometer. Control samples are processed with a similar workflow in the absence of SARS-CoV-  
357 2-specific peptide pool.

358

359 **Figure 2: SARS-CoV-2 serological assessment. A-** Quantification of SARS-CoV-2  
360 Nucleocapsid-specific antibodies using the Elecsys<sup>®</sup> Roche assay expressed as a cut-off index  
361 (signal sample/cut-off). Participants were grouped according to their clinical characteristics  
362 (Blue: no symptoms, no SARS-CoV-2 PCR performed; Orange: self-reported symptoms, SARS-  
363 CoV-2 PCR negative; and Red: self-reported symptoms, SARS-CoV-2 PCR positive). Bars  
364 represent the medians. The dotted line indicates the manufacturer's cut-off value for positivity.  
365 Statistical comparisons were performed using a Mann-Whitney T- test. **B-** SARS-CoV-2  
366 pseudovirus neutralization activity. SARS-CoV-2 pseudovirions pre-incubated with serially  
367 diluted patient plasma were used to infect ACE2-expressing HEK-293T cells. Luciferase activity  
368 as a measure for infection was assessed 3 days post-infection, and results are expressed as  
369 infection compared to control (untreated virions, grey shaded area) which was set 100%.

370

371 **Figure 3: Magnitude and functional profile of SARS-CoV-2-specific CD4 T cells. A-**  
372 Proportion of participants exhibiting a detectable SARS-CoV-2-specific CD4 T cell response. **B-**

373 Representative examples of TNF $\alpha$  and IFN $\gamma$  production in CD4 T cells in response to SARS-  
374 CoV-2 peptide pool. NS: no stimulation. C- Magnitude of SARS-CoV-2-specific CD4 T cell  
375 response (expressed as a percentage of total CD4 T cells) in participants grouped according to  
376 their clinical characteristics (Blue: no symptoms, no SARS-CoV-2 PCR performed; Orange: self-  
377 reported symptoms, SARS-CoV-2 PCR negative; and Red: self-reported symptoms, SARS-CoV-  
378 2 PCR positive). The number of participants and % of responders in each group is presented at  
379 the bottom of the graph. Statistical comparisons were performed using the Kruskal-Wallis test. D-  
380 Polyfunctional profile of SARS-CoV-2-specific CD4 T cells in each group. The x-axis displays  
381 the composition of each combination which is denoted with a dot for the presence of IL-2, IFN $\gamma$   
382 and TNF $\alpha$ . The medians (black bar) are shown. Each combination is color-coded, and data are  
383 summarized in the pie charts, where each pie slice represents the median contribution of each  
384 combination to the total SARS-CoV-2 response. The arcs identify the contribution of TNF $\alpha$  (light  
385 grey), IL-2 (grey) and IFN $\gamma$  (black) to SARS-CoV-2 response. The Wilcoxon Rank Sum Test was  
386 used to compare response patterns between groups. Statistical differences between pie charts  
387 were defined using a permutation test.

388

389 **Figure 4: Memory differentiation profile and Granzyme B (GrB) expression in SARS-CoV-**

390 **2-specific CD4 T cells. A-** Representative examples of the memory differentiation profile of

391 SARS-CoV-2-specific CD4 T cells based on the expression of CD45RA and CD27. The flow

392 plot on the right shows the distribution of Naïve (CD45RA+CD27+), Early differentiated (ED:

393 CD45RA-CD27+), Late differentiated (LD: CD45RA-CD27-) and Effector (Eff:

394 CD45RA+CD27-) in total CD4 T cells. **B-** Summary graph of the proportion of ED and LD in

395 SARS-CoV-2-specific CD4 T cells in each group (Blue: no symptoms, no SARS-CoV-2 PCR

396 performed; Orange: self-reported symptoms, SARS-CoV-2 PCR negative and Red: self-reported

397 symptoms, SARS-CoV-2 PCR positive). Statistical comparisons were performed using the

398 Kruskal-Wallis test. **C-** Representative examples of GrB expression in total and SARS-CoV-2-

399 specific CD4 T cells. **D-** Summary graph of GrB expression in SARS-CoV-2-specific CD4 T  
400 cells in each group. Statistical comparisons were performed using the Kruskal-Wallis test. **E-**  
401 Relationship between the proportion of ED within SARS-CoV-2-specific CD4 T cells and GrB  
402 expression or the proportion of IFN $\gamma$ +TNF $\alpha$ +IL2- SARS-CoV-2-specific CD4 T cells.  
403 Correlations were tested by a two-tailed non-parametric Spearman rank test.

404

405 **Figure 5: Phenotypic signature of SARS-CoV-2-specific IFN $\gamma$ + CD4+ T cells according to**  
406 **clinical characteristics. A-** Non-supervised two-way hierarchical cluster analysis (HCA, Ward  
407 method) using three phenotypic parameters (i.e. GrB expression and the proportion of ED and  
408 IFN $\gamma$ +TNF $\alpha$ +IL2-) from SARS-CoV-2-specific CD4 T cells. Each column represents a  
409 participant and is color-coded according to their clinical characteristics indicated by a dot at the  
410 top of the dendrogram (Blue: no symptoms, no SARS-CoV-2 PCR performed; Orange: self-  
411 reported symptoms, SARS-CoV-2 PCR negative; and Red: self-reported symptoms, SARS-CoV-  
412 2 PCR positive). Participants with a positive SARS-CoV-2 serology test are indicated by a black  
413 box and a white box identifies SARS-CoV-2 antibody-negative subjects. Data are depicted as a  
414 heatmap coloured from minimum to maximum values for each parameter. **B-** Principal  
415 component analysis on correlations, derived from the three studied parameters. Each dot  
416 represents a participant. The two axes represent principal components 1 (PC1) and 2 (PC2). Their  
417 contribution to the total data variance is shown as a percentage. **C-** Loading plot showing how  
418 each parameter influences PC1 and PC2 values.

419

420 **Figure 6: Activation profile of SARS-CoV-2-specific CD4 T cells. A-** CD38, HLA-DR, Ki67  
421 and PD-1 expression in SARS-CoV-2-specific CD4 T cells in each group (Blue: no symptoms,  
422 no SARS-CoV-2 PCR performed; Orange: self-reported symptoms, SARS-CoV-2 PCR negative  
423 and Red: self-reported symptoms, SARS-CoV-2 PCR positive). No significant differences were  
424 observed between groups for any markers, using the Kruskal-Wallis test. **B-** Association between

425 CD38 expression in SARS-CoV-2-specific CD4 T cells and the time post SARS-CoV-2 PCR  
426 positive test (weeks). Each symbol represents a participant (n=9). Dotted red lines identify  
427 participant with longitudinal samples. Correlations were tested by a two-tailed non-parametric  
428 Spearman rank test. C- Comparison of the correlation between the time post SARS-CoV-2 PCR  
429 positive test (weeks) and the expression of different activation profile markers, ranked according  
430 to the strength of the association. Spearman correlation  $r$  values are plotted on the x-axis and  
431 corresponding  $P$ -values are shown within each bar.

## 432 REFERENCES

433

- 434 Altmann, D.M., and R.J. Boyton. 2020. SARS-CoV-2 T cell immunity: Specificity, function,  
435 durability, and role in protection. *Sci Immunol* 5. DOI: 10.1126/sciimmunol.abd6160:
- 436 Barber, D.L., E.J. Wherry, D. Masopust, B. Zhu, J.P. Allison, A.H. Sharpe, G.J. Freeman, and R.  
437 Ahmed. 2006. Restoring function in exhausted CD8 T cells during chronic viral infection.  
438 *Nature* 439:682-687.
- 439 Blanco-Melo, D., B.E. Nilsson-Payant, W.C. Liu, S. Uhl, D. Hoagland, R. Moller, T.X. Jordan,  
440 K. Oishi, M. Panis, D. Sachs, T.T. Wang, R.E. Schwartz, J.K. Lim, R.A. Albrecht, and  
441 B.R. tenOever. 2020. Imbalanced host response to SARS-CoV-2 drives development of  
442 COVID-19. *Cell* 181:1036-1045 e1039.
- 443 Braun, J., L. Loyal, M. Frentsch, D. Wendisch, P. Georg, F. Kurth, S. Hippenstiel, M. Dingeldey,  
444 B. Kruse, F. Fauchere, E. Baysal, M. Mangold, L. Henze, R. Lauster, M.A. Mall, K.  
445 Beyer, J. Rohmel, S. Voigt, J. Schmitz, S. Miltenyi, I. Demuth, M.A. Muller, A. Hocke,  
446 M. Witzernath, N. Suttorp, F. Kern, U. Reimer, H. Wenschuh, C. Drosten, V.M. Corman,  
447 C. Giesecke-Thiel, L.E. Sander, and A. Thiel. 2020. SARS-CoV-2-reactive T cells in  
448 healthy donors and patients with COVID-19. *Nature* Doi: 10.1038/s41586-020-2598-9:
- 449 Buck, C.B., D.V. Pastrana, D.R. Lowy, and J.T. Schiller. 2004. Efficient intracellular assembly of  
450 papillomaviral vectors. *J Virol* 78:751-757.
- 451 Buck, C.B., D.V. Pastrana, D.R. Lowy, and J.T. Schiller. 2005. Generation of HPV pseudovirions  
452 using transfection and their use in neutralization assays. *Methods Mol Med* 119:445-462.
- 453 Canete, P.F., and C.G. Vinuesa. 2020. COVID-19 makes B cells forget, but T cells remember.  
454 *Cell* 183:13-15.
- 455 Chen, Z., and E.J. Wherry. 2020. T cell responses in patients with COVID-19. *Nat Rev Immunol*  
456 20:529-536.
- 457 Cox, R.J., and K.A. Brokstad. 2020. Not just antibodies: B cells and T cells mediate immunity to  
458 COVID-19. *Nat Rev Immunol* 20:581-582.
- 459 Favresse, J., C. Eucher, M. Elsen, M. Tre-Hardy, J.M. Dogne, and J. Douxfils. 2020. Clinical  
460 performance of the Elecsys electrochemiluminescent immunoassay for the detection of  
461 SARS-CoV-2 total antibodies. *Clin Chem* 66:1104-1106.
- 462 Grifoni, A., D. Weiskopf, S.I. Ramirez, J. Mateus, J.M. Dan, C.R. Moderbacher, S.A. Rawlings,  
463 A. Sutherland, L. Premkumar, R.S. Jadi, D. Marrama, A.M. de Silva, A. Frazier, A.F.  
464 Carlin, J.A. Greenbaum, B. Peters, F. Krammer, D.M. Smith, S. Crotty, and A. Sette.  
465 2020. Targets of T cell responses to SARS-CoV-2 coronavirus in humans with COVID-  
466 19 disease and unexposed individuals. *Cell* 181:1489-1501 e1415.
- 467 Hanekom, W.A., J. Hughes, M. Mavinkurve, M. Mendillo, M. Watkins, H. Gamielien, S.J.  
468 Gelderbloem, M. Sidibana, N. Mansoor, V. Davids, R.A. Murray, A. Hawkrige, P.A.  
469 Haslett, S. Ress, G.D. Hussey, and G. Kaplan. 2004. Novel application of a whole blood  
470 intracellular cytokine detection assay to quantitate specific T-cell frequency in field  
471 studies. *J Immunol Methods* 291:185-195.
- 472 Jubel, J.M., Z.R. Barbati, C. Burger, D.C. Wirtz, and F.A. Schildberg. 2020. The role of PD-1 in  
473 acute and chronic infection. *Front Immunol* 11:487.
- 474 Juno, J.A., D. van Bockel, S.J. Kent, A.D. Kelleher, J.J. Zaunders, and C.M. Munier. 2017.  
475 Cytotoxic CD4 T cells - Friend or foe during viral infection? *Front Immunol* 8:19.
- 476 Le Bert, N., A.T. Tan, K. Kunasegaran, C.Y.L. Tham, M. Hafezi, A. Chia, M.H.Y. Chng, M. Lin,  
477 N. Tan, M. Linster, W.N. Chia, M.I. Chen, L.F. Wang, E.E. Ooi, S. Kalimuddin, P.A.  
478 Tambyah, J.G. Low, Y.J. Tan, and A. Bertoletti. 2020. SARS-CoV-2-specific T cell  
479 immunity in cases of COVID-19 and SARS, and uninfected controls. *Nature* 584:457-  
480 462.

- 481 Lipsitch, M., Y.H. Grad, A. Sette, and S. Crotty. 2020. Cross-reactive memory T cells and herd  
482 immunity to SARS-CoV-2. *Nat Rev Immunol* 20:709-713.
- 483 Liu, L., W. Liu, Y. Zheng, X. Jiang, G. Kou, J. Ding, Q. Wang, Q. Huang, Y. Ding, W. Ni, W.  
484 Wu, S. Tang, L. Tan, Z. Hu, W. Xu, Y. Zhang, B. Zhang, Z. Tang, X. Zhang, H. Li, Z.  
485 Rao, H. Jiang, X. Ren, S. Wang, and S. Zheng. 2020a. A preliminary study on serological  
486 assay for severe acute respiratory syndrome coronavirus 2 (SARS-CoV-2) in 238  
487 admitted hospital patients. *Microbes Infect* 22:206-211.
- 488 Liu, Y., L.M. Yan, L. Wan, T.X. Xiang, A. Le, J.M. Liu, M. Peiris, L.L.M. Poon, and W. Zhang.  
489 2020b. Viral dynamics in mild and severe cases of COVID-19. *Lancet Infect Dis* 20:656-  
490 657.
- 491 Margolin, E., W.A. Burgers, E.D. Sturrock, M. Mendelson, R. Chapman, N. Douglass, A.L.  
492 Williamson, and E.P. Rybicki. 2020. Prospects for SARS-CoV-2 diagnostics, therapeutics  
493 and vaccines in Africa. *Nat Rev Microbiol* DOI: 10.1038/s41579-020-00441-3:
- 494 Mathew, D., J.R. Giles, A.E. Baxter, D.A. Oldridge, A.R. Greenplate, J.E. Wu, C. Alanio, L.  
495 Kuri-Cervantes, M.B. Pampena, K. D'Andrea, S. Manne, Z. Chen, Y.J. Huang, J.P. Reilly,  
496 A.R. Weisman, C.A.G. Ittner, O. Kuthuru, J. Dougherty, K. Nzingha, N. Han, J. Kim, A.  
497 Pattekar, E.C. Goodwin, E.M. Anderson, M.E. Weirick, S. Gouma, C.P. Arevalo, M.J.  
498 Bolton, F. Chen, S.F. Lacey, H. Ramage, S. Cherry, S.E. Hensley, S.A. Apostolidis, A.C.  
499 Huang, L.A. Vella, U.P.C.P. Unit, M.R. Betts, N.J. Meyer, and E.J. Wherry. 2020. Deep  
500 immune profiling of COVID-19 patients reveals distinct immunotypes with therapeutic  
501 implications. *Science* 369. DOI: 10.1126/science.abc8511:
- 502 Mendelson, M., L. Boloko, A. Boutall, L. Cairncross, G. Calligaro, C. Coccia, J.A. Dave, M. de  
503 Villiers, S. Dlamini, P. Frankenfeld, P. Gina, M.V. Gule, J. Hoare, R. Hofmeyr, M. Hsiao,  
504 I. Joubert, T. Kahn, R. Krause, A. Kroopman, D. Levin, D. Maughan, S. Mazondwa, G.  
505 Meintjes, R. Nordien, N. Ntusi, N. Papavarnavas, J. Peter, H. Pickard, P. Raubenheimer,  
506 Q. Said-Hartley, P. Singh, S. Wasserman, and o.b.o.t.G.S.H.C.-R. Team. 2020. Clinical  
507 management of COVID-19: Experiences of the COVID-19 epidemic from Groote Schuur  
508 Hospital, Cape Town, South Africa. *South African Medical Journal* 110:973-981.
- 509 Mou, H., B.D. Quinlan, H. Peng, Y. Guo, S. Peng, L. Zhang, M.E. Davis-Gardner, M.R. Gardner,  
510 G. Crynen, Z.X. Voo, C.C. Bailey, M.D. Alpert, C. Rader, H. Choe, and M. Farzan. 2020.  
511 Mutations from bat ACE2 orthologs markedly enhance ACE2-Fc neutralization of SARS-  
512 CoV-2. *BioRxiv* DOI: 10.1101/2020.06.29.178459:
- 513 Muench, P., S. Jochum, V. Wenderoth, B. Ofenloch-Haehnle, M. Hombach, M. Strobl, H.  
514 Sadlowski, C. Sachse, G. Torriani, I. Eckerle, and A. Riedel. 2020. Development and  
515 validation of the Elecsys anti-SARS-CoV-2 immunoassay as a highly specific tool for  
516 determining past exposure to SARS-CoV-2. *J Clin Microbiol* 58. DOI:  
517 10.1128/JCM.01694-20:
- 518 National, S.-C.-S.A.E.G. 2020. Performance characteristics of five immunoassays for SARS-  
519 CoV-2: a head-to-head benchmark comparison. *Lancet Infect Dis*. DOI: 10.1016/S1473-  
520 3099(20)30634-4:
- 521 Ogbe, A., B. Kronsteiner, D.T. Donal T. Skelly, M. Pace, and A. Brown. 2020. T cell assays  
522 differentiate clinical and subclinical SARS-CoV-2 infections from cross-reactive antiviral  
523 responses. *MedRxiv* DOI: 10.1101/2020.1109.1128.20202929.
- 524 Pachnio, A., M. Ciaurriz, J. Begum, N. Lal, J. Zuo, A. Beggs, and P. Moss. 2016.  
525 Cytomegalovirus infection leads to development of high frequencies of cytotoxic virus-  
526 specific CD4+ T cells targeted to vascular endothelium. *PLoS Pathog* 12:e1005832.
- 527 Quinti, I., V. Lougaris, C. Milito, F. Cinetto, A. Pecoraro, I. Mezzaroma, C.M. Mastroianni, O.  
528 Turriziani, M.P. Bondioni, M. Filippini, A. Soresina, G. Spadaro, C. Agostini, R. Carsetti,  
529 and A. Plebani. 2020. A possible role for B cells in COVID-19? Lesson from patients  
530 with agammaglobulinemia. *J Allergy Clin Immunol* 146:211-213 e214.
- 531 Riou, C., E. Du Bruyn, S. Ruzive, R.T. Goliath, C.S. Lindestam Arlehamn, A. Sette, A. Sher,  
532 D.L. Barber, and R.J. Wilkinson. 2020. Disease extent and anti-tubercular treatment



- 533 response correlates with *Mycobacterium tuberculosis*-specific CD4 T-cell phenotype  
534 regardless of HIV-1 status. *Clin Transl Immunology* 9:e1176.
- 535 Rogers, T.F., F. Zhao, D. Huang, N. Beutler, A. Burns, W.T. He, O. Limbo, C. Smith, G. Song, J.  
536 Woehl, L. Yang, R.K. Abbott, S. Callaghan, E. Garcia, J. Hurtado, M. Parren, L. Peng, S.  
537 Ramirez, J. Ricketts, M.J. Ricciardi, S.A. Rawlings, N.C. Wu, M. Yuan, D.M. Smith, D.  
538 Nemazee, J.R. Teijaro, J.E. Voss, I.A. Wilson, R. Andrabi, B. Briney, E. Landais, D. Sok,  
539 J.G. Jardine, and D.R. Burton. 2020. Isolation of potent SARS-CoV-2 neutralizing  
540 antibodies and protection from disease in a small animal model. *Science* 369:956-963.
- 541 Rydyznski Moderbacher, C., S.I. Ramirez, J.M. Dan, A. Grifoni, K.M. Hastie, D. Weiskopf, S.  
542 Belanger, R.K. Abbott, C. Kim, J. Choi, Y. Kato, E.G. Crotty, C. Kim, S.A. Rawlings, J.  
543 Mateus, L.P.V. Tse, A. Frazier, R. Baric, B. Peters, J. Greenbaum, E. Ollmann Saphire,  
544 D.M. Smith, A. Sette, and S. Crotty. 2020. Antigen-specific adaptive immunity to SARS-  
545 CoV-2 in acute COVID-19 and associations with age and disease severity. *Cell*. DOI:  
546 10.1016/j.cell.2020.09.038:
- 547 Sattler, A., S. Angermair, H. Stockmann, K.M. Heim, D. Khadzhynov, S. Treskatsch, F. Halleck,  
548 M.E. Kreis, and K. Kotsch. 2020. SARS-CoV-2 specific T-cell responses and correlations  
549 with COVID-19 patient predisposition. *J Clin Invest*. DOI: 10.1172/JCI140965:
- 550 Schub, D., V. Klemis, S. Schneitler, J. Mihm, P.M. Lepper, H. Wilkens, R. Bals, H. Eichler, B.C.  
551 Gartner, S.L. Becker, U. Sester, M. Sester, and T. Schmidt. 2020. High levels of SARS-  
552 CoV-2-specific T cells with restricted functionality in severe courses of COVID-19. *JCI*  
553 *Insight* 5:e142167.
- 554 Sekine, T., A. Perez-Potti, O. Rivera-Ballesteros, K. Stralin, J.B. Gorin, A. Olsson, S. Llewellyn-  
555 Lacey, H. Kamal, G. Bogdanovic, S. Muschiol, D.J. Wullimann, T. Kammann, J. Emgard,  
556 T. Parrot, E. Folkesson, C.-S.G. Karolinska, O. Rooyackers, L.I. Eriksson, J.I. Henter, A.  
557 Sonnerborg, T. Allander, J. Albert, M. Nielsen, J. Klingstrom, S. Gredmark-Russ, N.K.  
558 Bjorkstrom, J.K. Sandberg, D.A. Price, H.G. Ljunggren, S. Aleman, and M. Buggert.  
559 2020. Robust T cell immunity in convalescent individuals with asymptomatic or mild  
560 COVID-19. *Cell* 183:158-168 e114.
- 561 Sester, U., D. Presser, J. Dirks, B.C. Gartner, H. Kohler, and M. Sester. 2008. PD-1 expression  
562 and IL-2 loss of cytomegalovirus- specific T cells correlates with viremia and reversible  
563 functional anergy. *Am J Transplant* 8:1486-1497.
- 564 Sette, A., and S. Crotty. 2020. Pre-existing immunity to SARS-CoV-2: the knowns and  
565 unknowns. *Nat Rev Immunol* 20:457-458.
- 566 Wherry, E.J., and M. Kurachi. 2015. Molecular and cellular insights into T cell exhaustion. *Nat*  
567 *Rev Immunol* 15:486-499.
- 568 Wykes, M.N., and S.R. Lewin. 2018. Immune checkpoint blockade in infectious diseases. *Nat*  
569 *Rev Immunol* 18:91-104.
- 570 Zheng, H.Y., M. Zhang, C.X. Yang, N. Zhang, X.C. Wang, X.P. Yang, X.Q. Dong, and Y.T.  
571 Zheng. 2020. Elevated exhaustion levels and reduced functional diversity of T cells in  
572 peripheral blood may predict severe progression in COVID-19 patients. *Cell Mol*  
573 *Immunol* 17:541-543.
- 574

|                                                | <b>Healthcare Workers (n=31)</b> |                      |                      |                 |
|------------------------------------------------|----------------------------------|----------------------|----------------------|-----------------|
| n                                              | <b>15</b>                        | <b>7</b>             | <b>9</b>             | <i>P</i> -value |
| Self-reported symptoms                         | <b>No</b>                        | <b>Yes</b>           | <b>Yes</b>           | -               |
| Tested for COVID                               | <b>No</b>                        | <b>Yes</b>           | <b>Yes</b>           | -               |
| Positive SARS-CoV-2 PCR                        | <b>na</b>                        | <b>No</b>            | <b>Yes</b>           | -               |
| Positive SARS-CoV-2 N-spe IgG (%) <sup>a</sup> | <b>0%</b>                        | <b>0%</b>            | <b>88.9% (8/9)</b>   | -               |
| Presence of SARS nAbs (%) <sup>b</sup>         | <b>0%</b>                        | <b>0%</b>            | <b>100%</b>          | -               |
| Contact with COVID patients (%)                | <b>86.6%</b>                     | <b>100%</b>          | <b>88.9%</b>         | ns              |
| Time post PCR test (weeks) <sup>c</sup>        | <b>na</b>                        | <b>7.3 [6.3-8.4]</b> | <b>4.7 [2.6-7.2]</b> | 0.09            |

**Table 1: Clinical characteristics of study participants**

<sup>a</sup> Measured using the Elecsys® Roche system

<sup>b</sup> Measured using a SARS-CoV-2 pseudovirus neutralisation assay

<sup>c</sup> Median and Interquartile range (IQR)



**Figure 1**

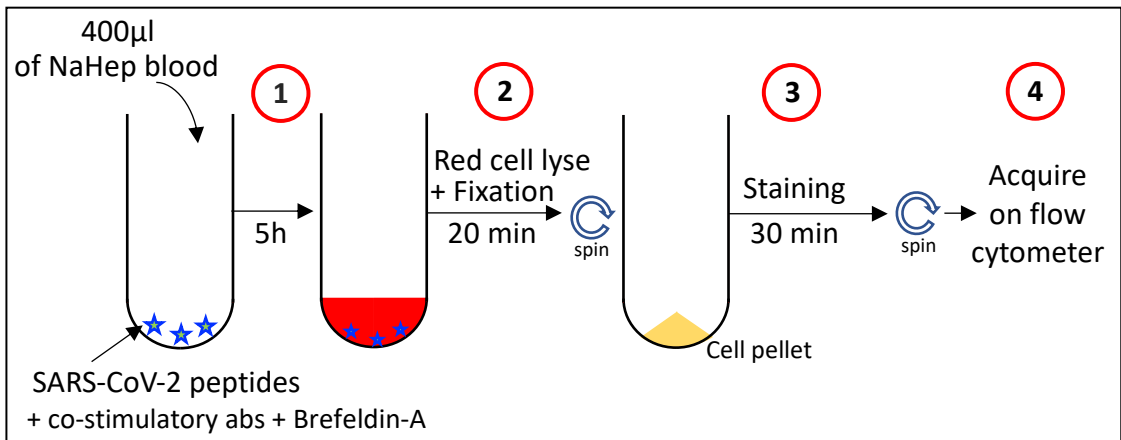

Figure 2

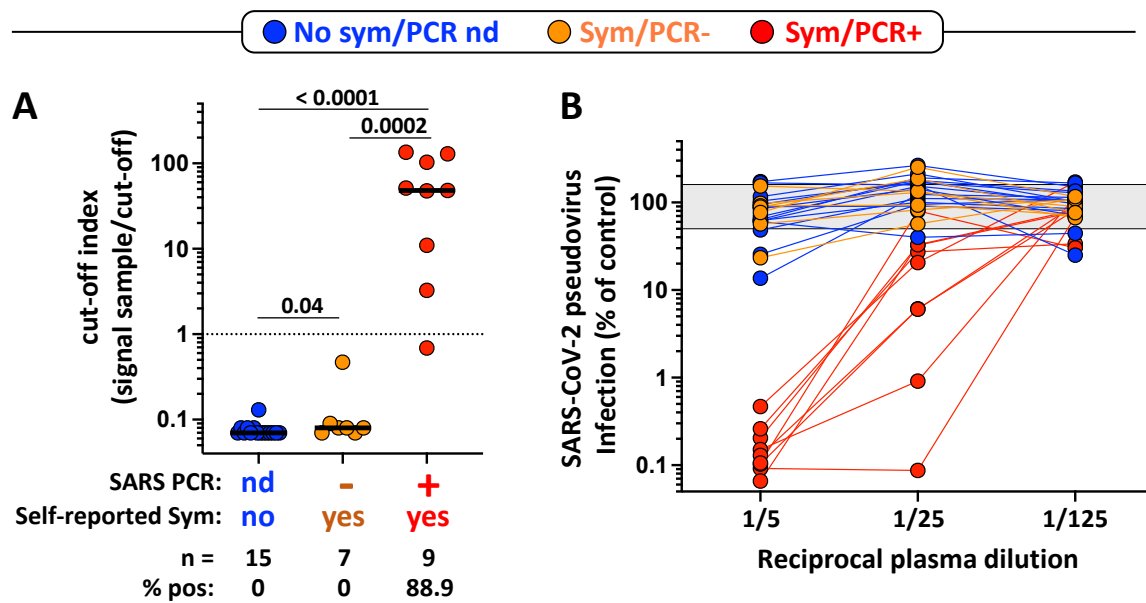

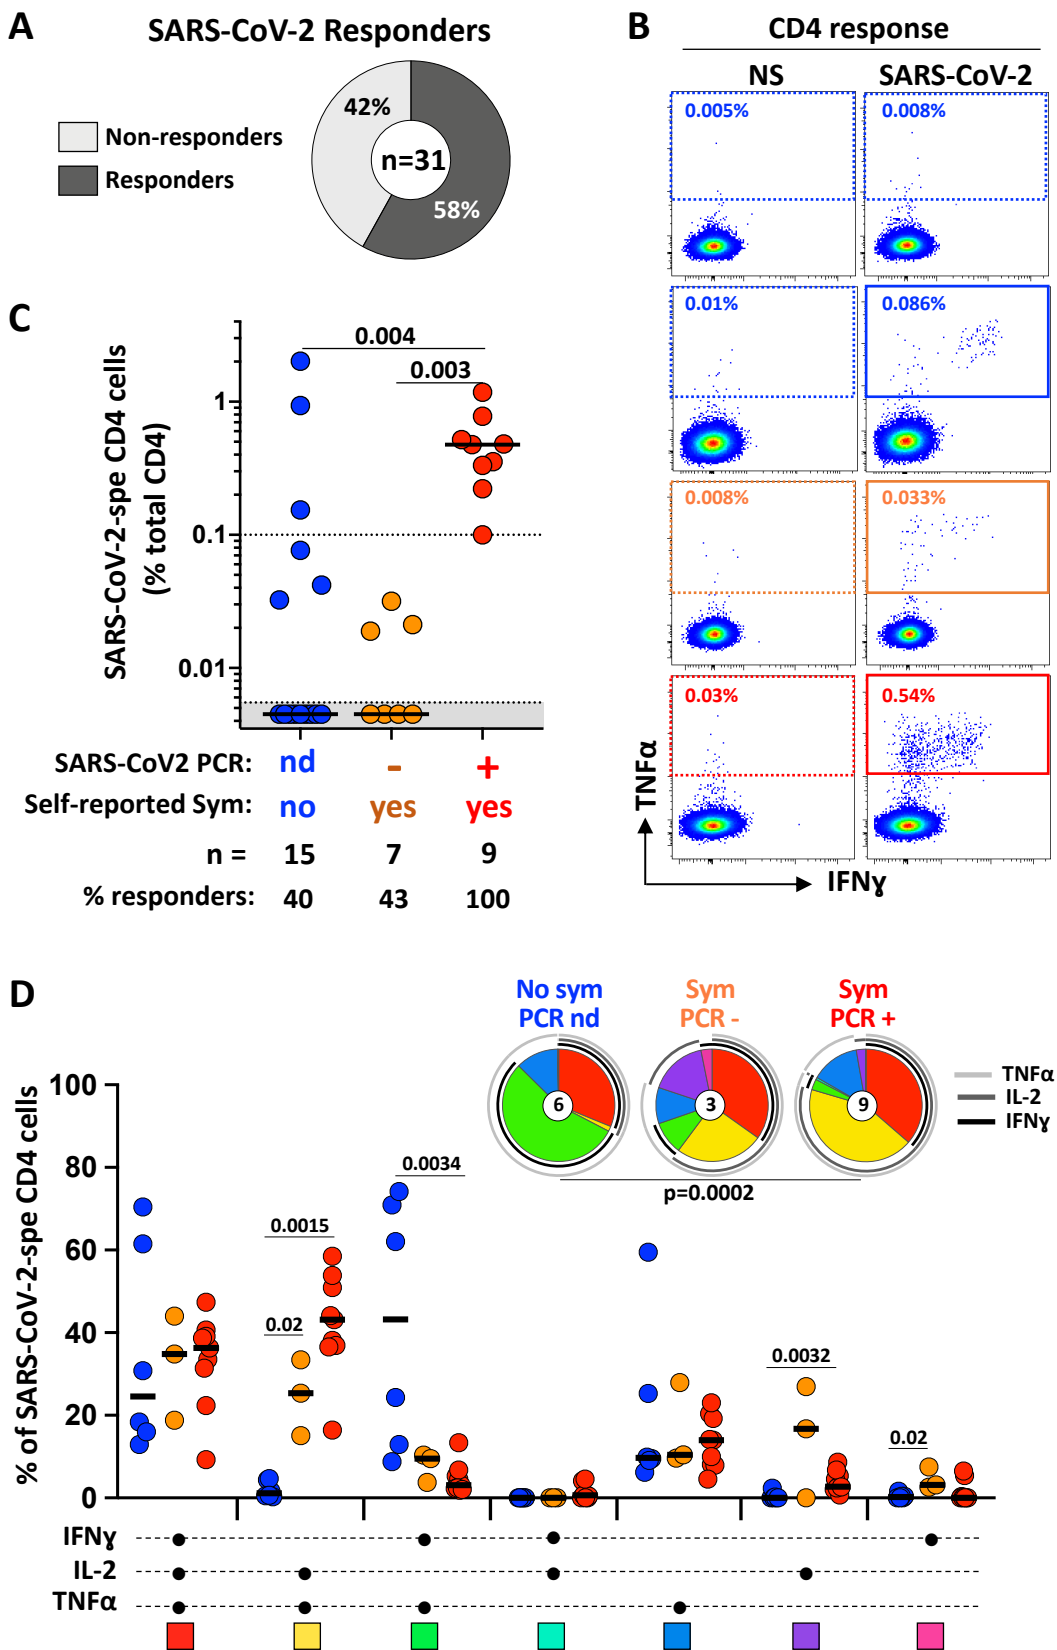

Figure 4

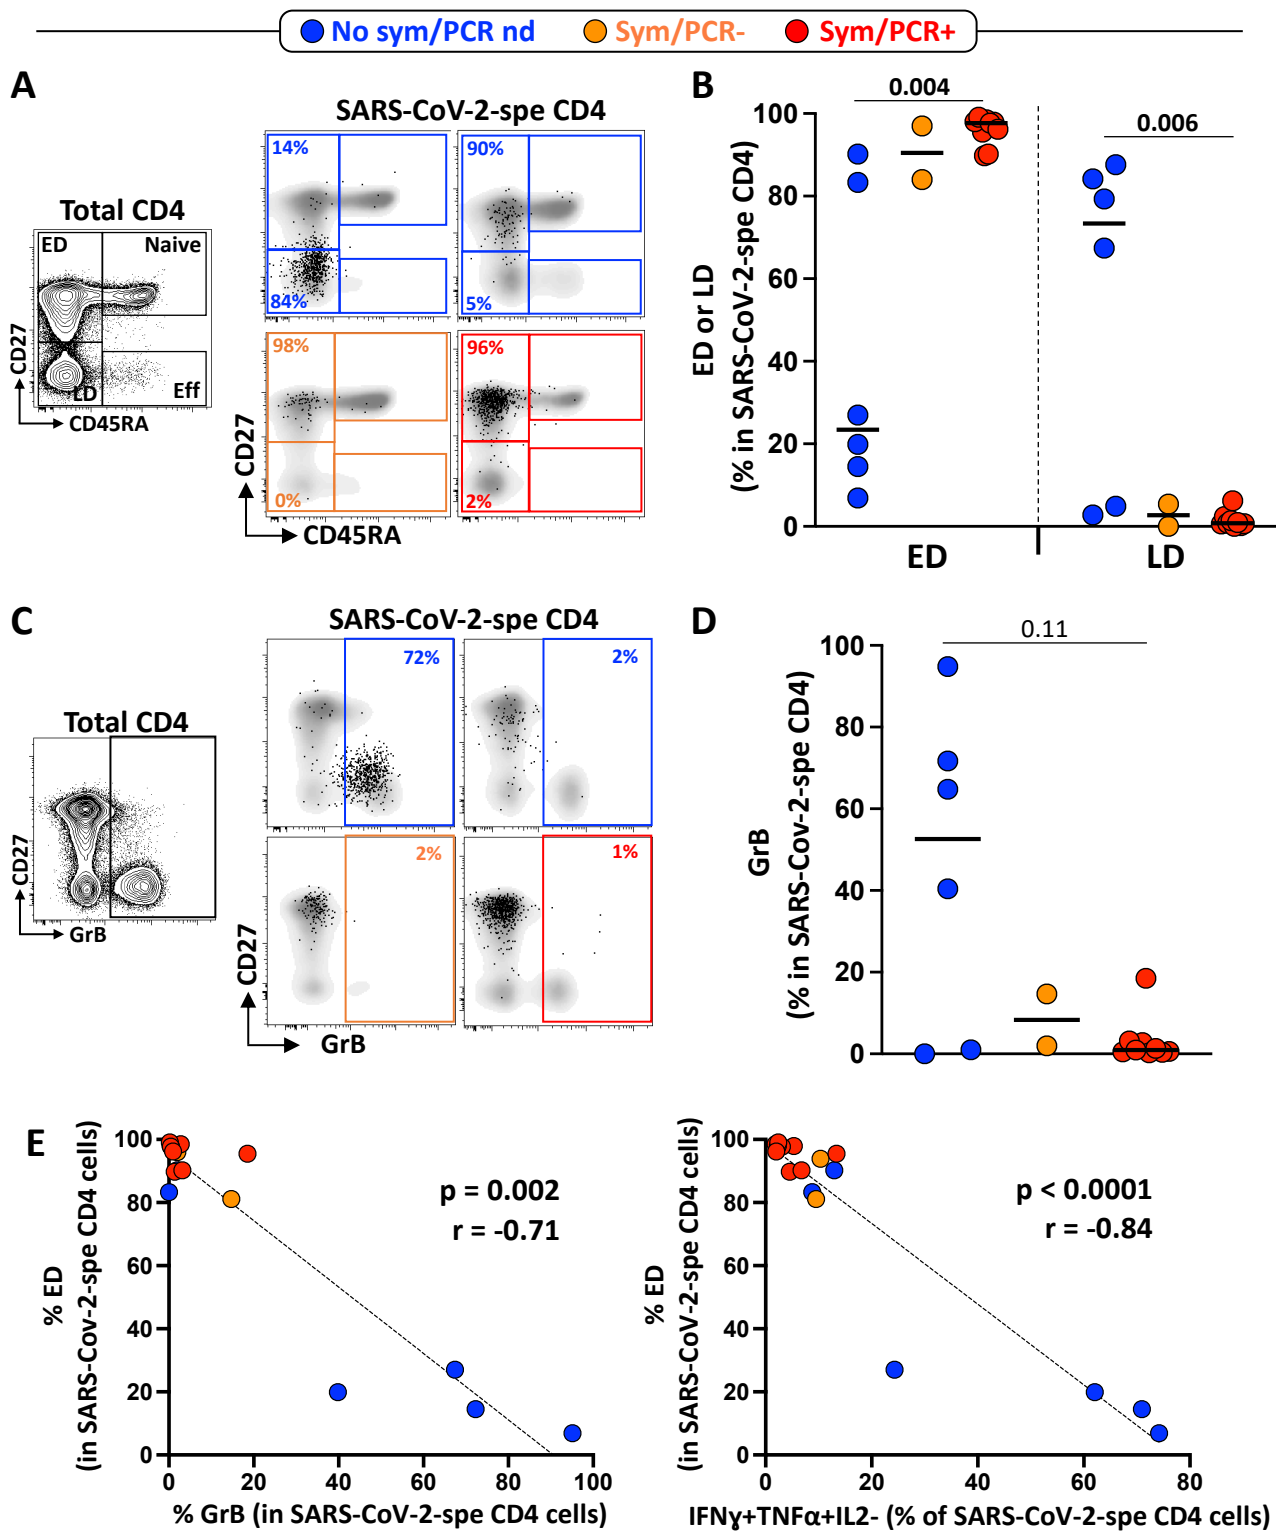

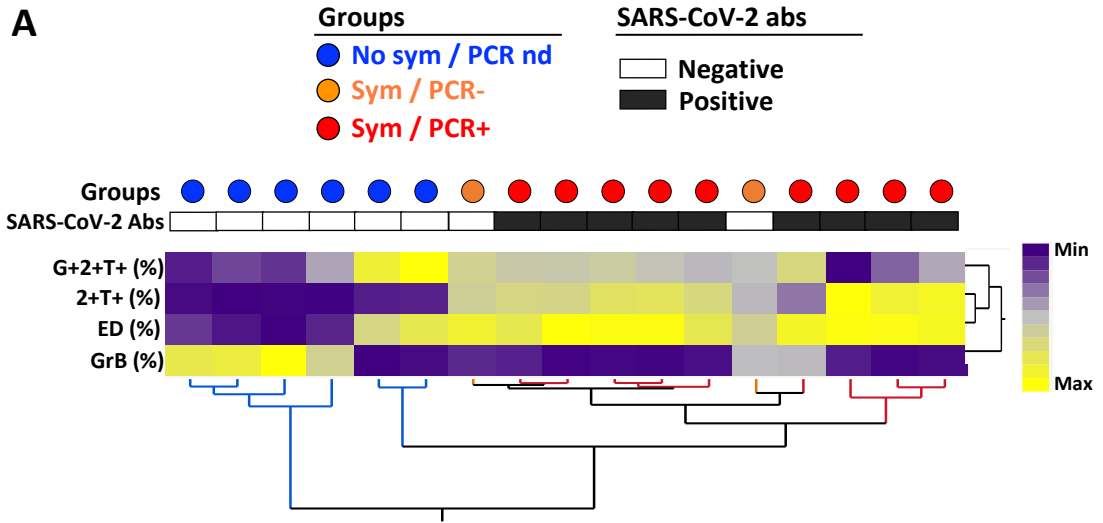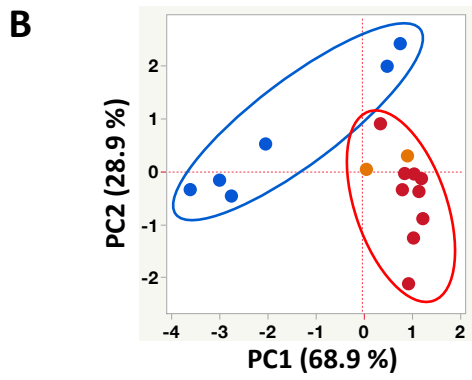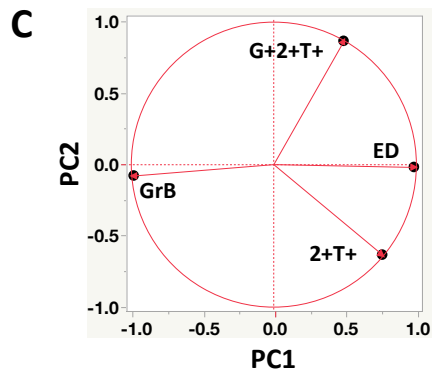

Figure 6

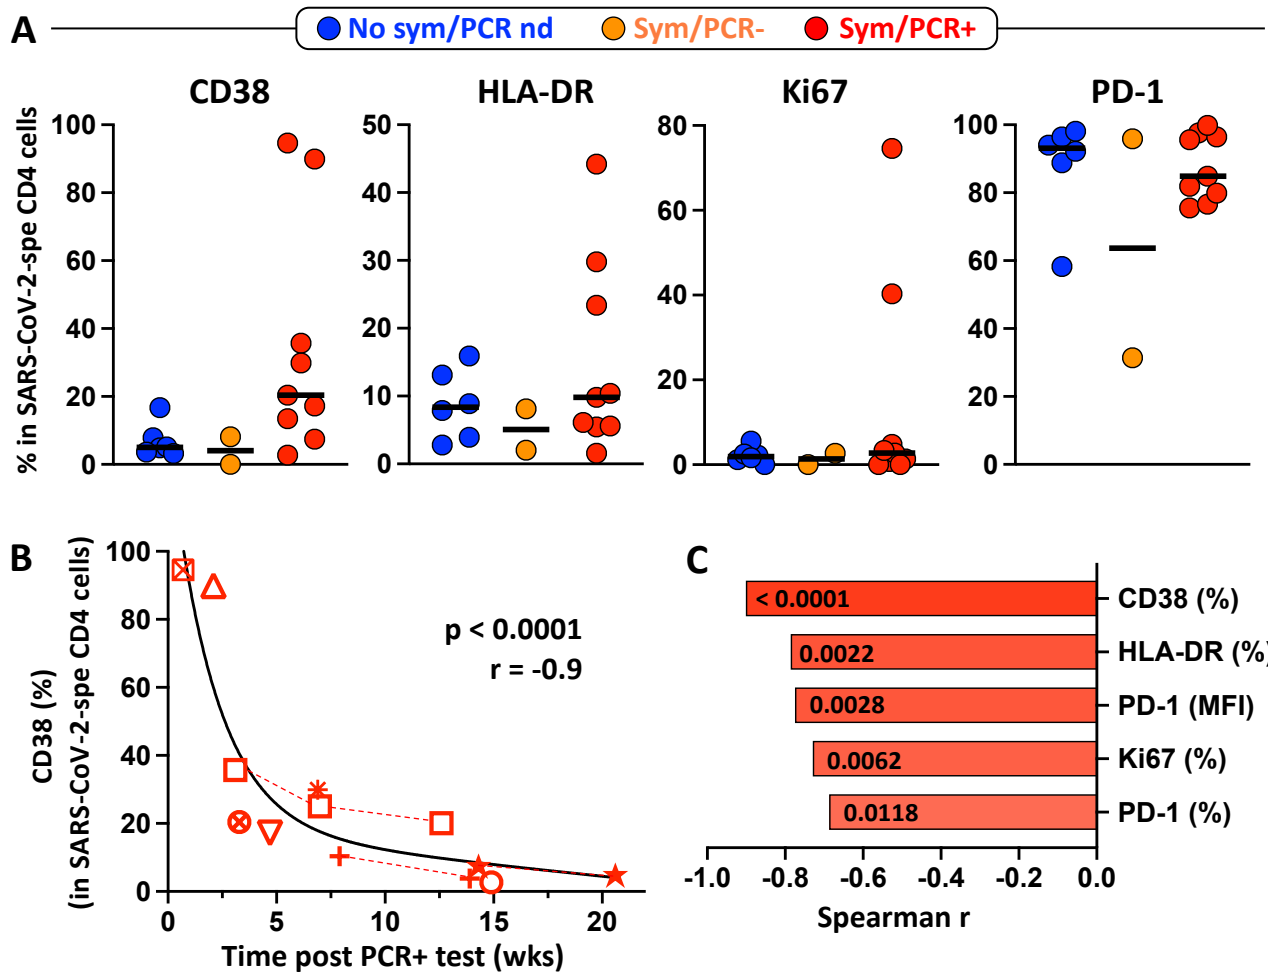

| Markers                       | Fluorochrome   | Clone     | Company       | Cat. Number | Role                   |
|-------------------------------|----------------|-----------|---------------|-------------|------------------------|
| <b>CD3</b>                    | BV650          | OKT3      | BioLegend     | 317323      | Lineage                |
| <b>CD4</b>                    | BV785          | OKT4      | BioLegend     | 317428      |                        |
| <b>CD8</b>                    | BV510          | RPA-T8    | BioLegend     | 301048      |                        |
| <b>CD45RA</b>                 | Alexa 488      | HI100     | BioLegend     | 304114      | Memory differentiation |
| <b>CD27</b>                   | PE-Cy5         | 1A4CD27   | Beckman       | 6607107     |                        |
| <b>CD38</b>                   | APC            | HIT2      | BD Bioscience | 555462      | Activation             |
| <b>HLA-DR</b>                 | BV605          | L243      | BioLegend     | 307640      |                        |
| <b>Ki67</b>                   | PerCP-Cy5.5    | B56       | BD Bioscience | 561284      |                        |
| <b>PD-1</b>                   | PE             | EH12.2H7  | BioLegend     | 329906      |                        |
| <b>GrB</b>                    | BV421          | GB11      | BD Bioscience | 563388      | Cytotoxic potential    |
| <b>IFN<math>\gamma</math></b> | BV711          | 4S.B3     | BioLegend     | 502540      | Functions              |
| <b>TNF<math>\alpha</math></b> | PE-Cy7         | MAB11     | BioLegend     | 502930      |                        |
| <b>IL-2</b>                   | PE/Dazzle™ 594 | MQ1-17H12 | BioLegend     | 500344      |                        |

**Supp table 1:** Description of the antibody panel used in the study.

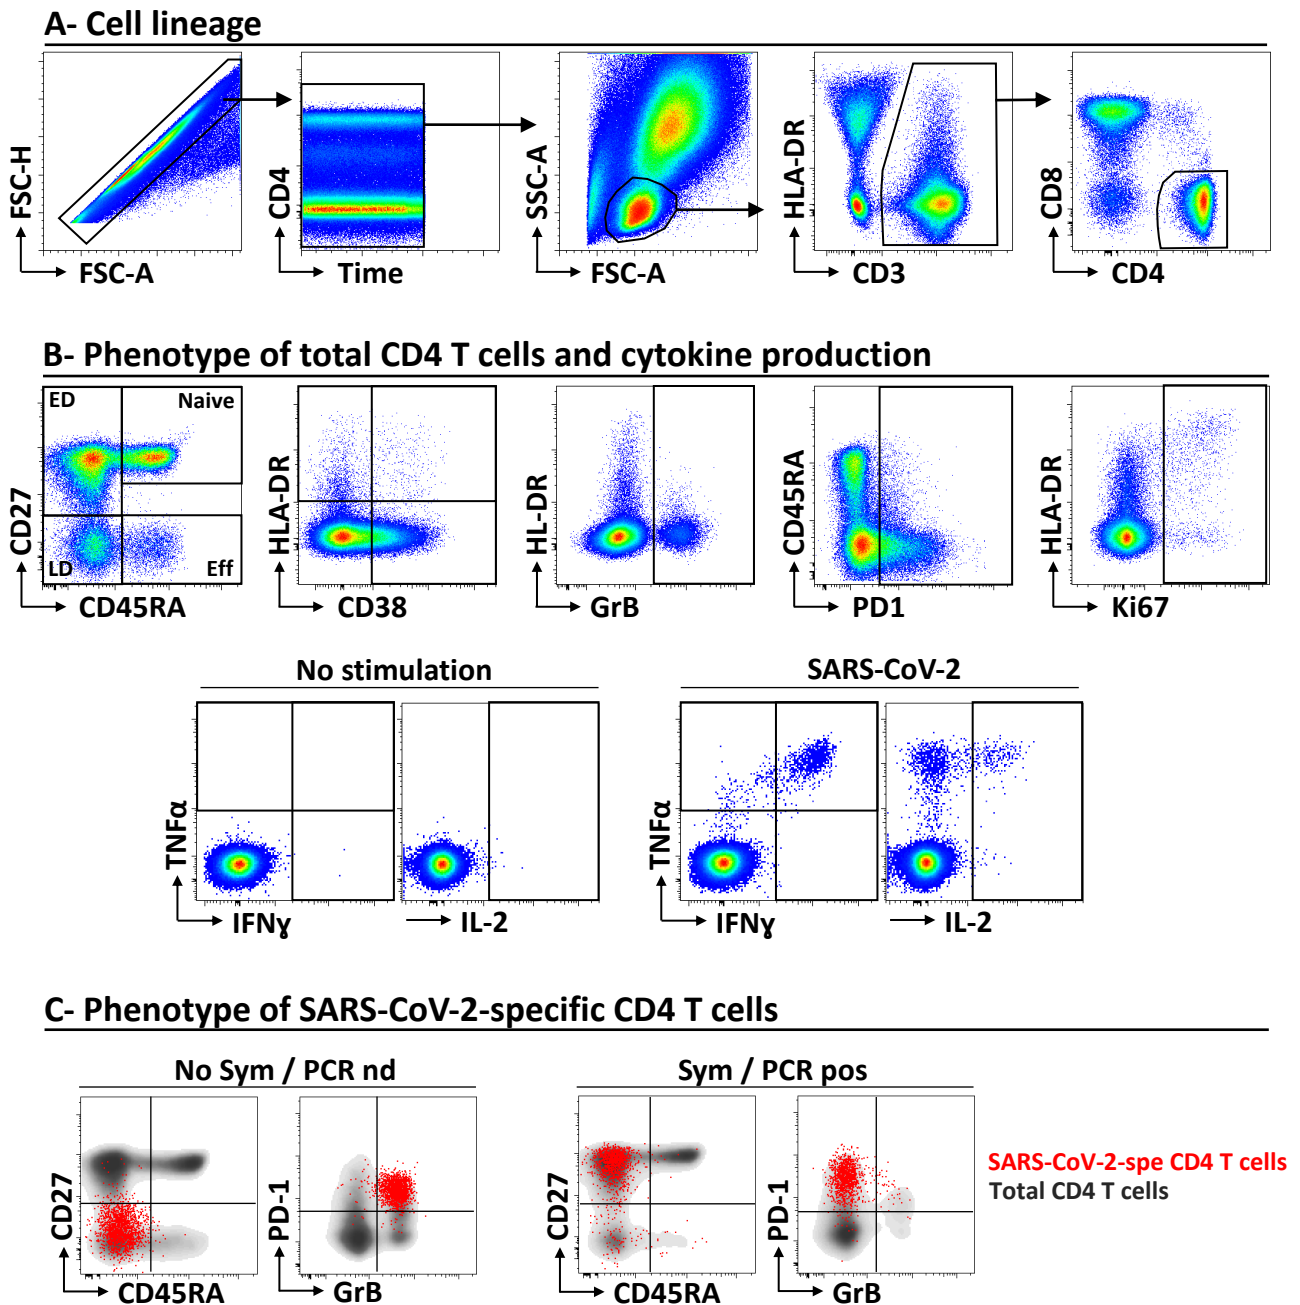

**Supp Figure 1:** Gating strategy used to identify SARS-CoV-2 specific CD4 T cells and defined their phenotypic characteristics. **A-** Cell lineage. **B-** Phenotyping of total CD4 T cell and cytokine production in response to SARS-CoV-2 peptides. **C-** Phenotype of SARS-CoV-2 responding CD4 T cells in one participant with no symptom (left) and one COVID-19 confirmed participant (right). SARS-CoV-2-specific CD4 T cells (expressing any measured cytokine) are depicted in red.



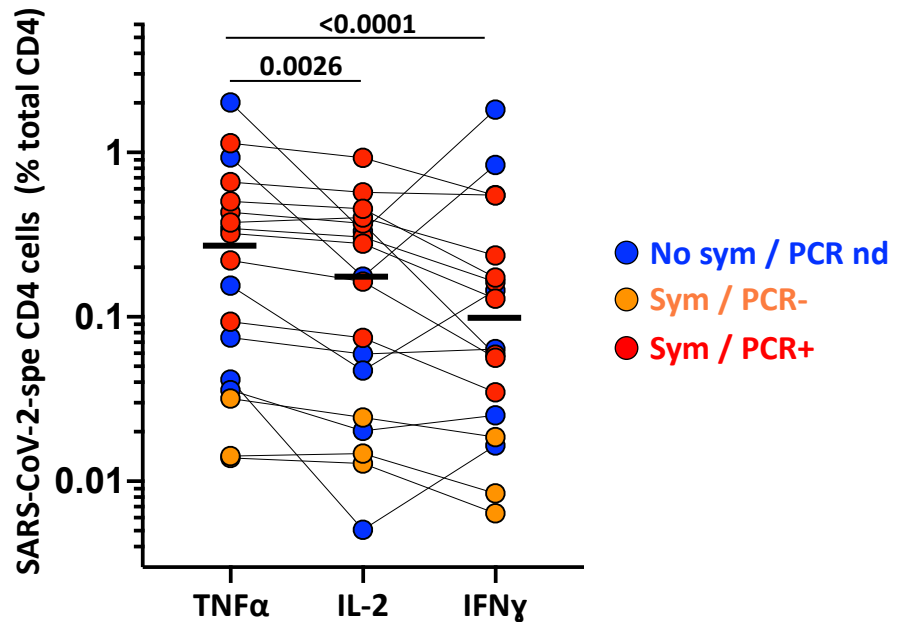

**Supp Figure 2: Comparison of magnitude of SARS-CoV-2-specific CD4 T cell response expressing TNF $\alpha$ , IL-2 or IFN $\gamma$  in participants exhibiting a detectable response to SARS-CoV-2 peptide pool.** Each dot represent a participant and is color-coded according to clinical characteristics (Blue represents no symptoms, no SARS-CoV-2 PCR performed; Orange: self-reported symptoms, SARS-CoV-2 PCR negative and Red: self-reported symptoms, SARS-CoV-2 PCR positive). Black bars indicate medians. Statistical comparisons were performed using a nonparametric paired Friedman test.
